# Supplementary material
Source: PubMed Central journal article supplement (PMC8251483)

The following guide was prepared with AutoDesk ReCap Photo (product version:21.0.0.52). Subsequent versions may will have differences.

Prerequisites of this guide:

- ReCap photo is downloaded and installed.
- Either having Educational license or a valid subscription with enough cloud credits for the AutoDesk services.
- Photos (minimum 20 images, with at least 60% overlap) are taken.
- Online connection.

Click on Create 3D Object.

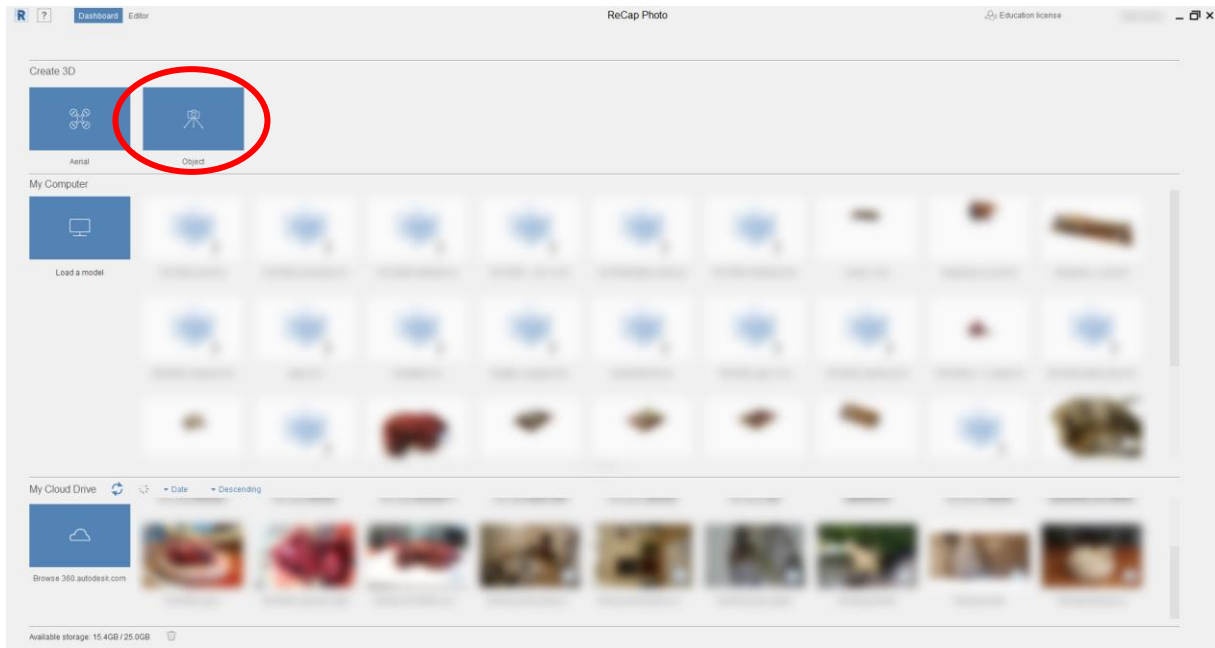

Click anywhere on the Editor surface to open the image browser.

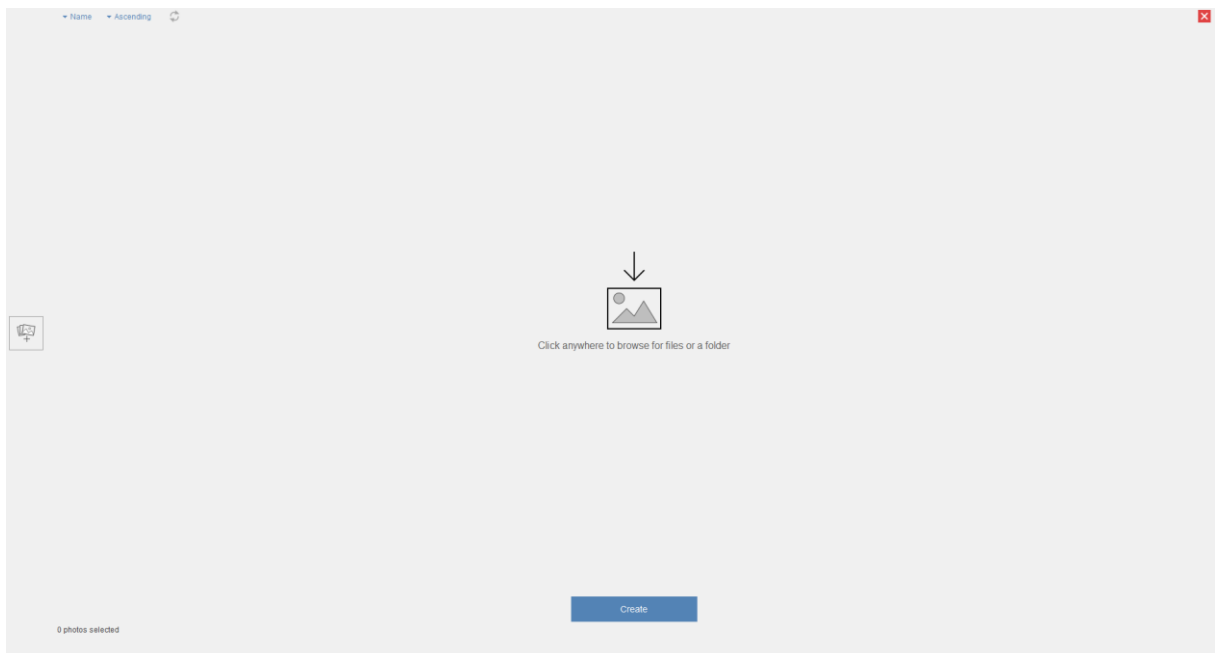

Choose the photos of the project.

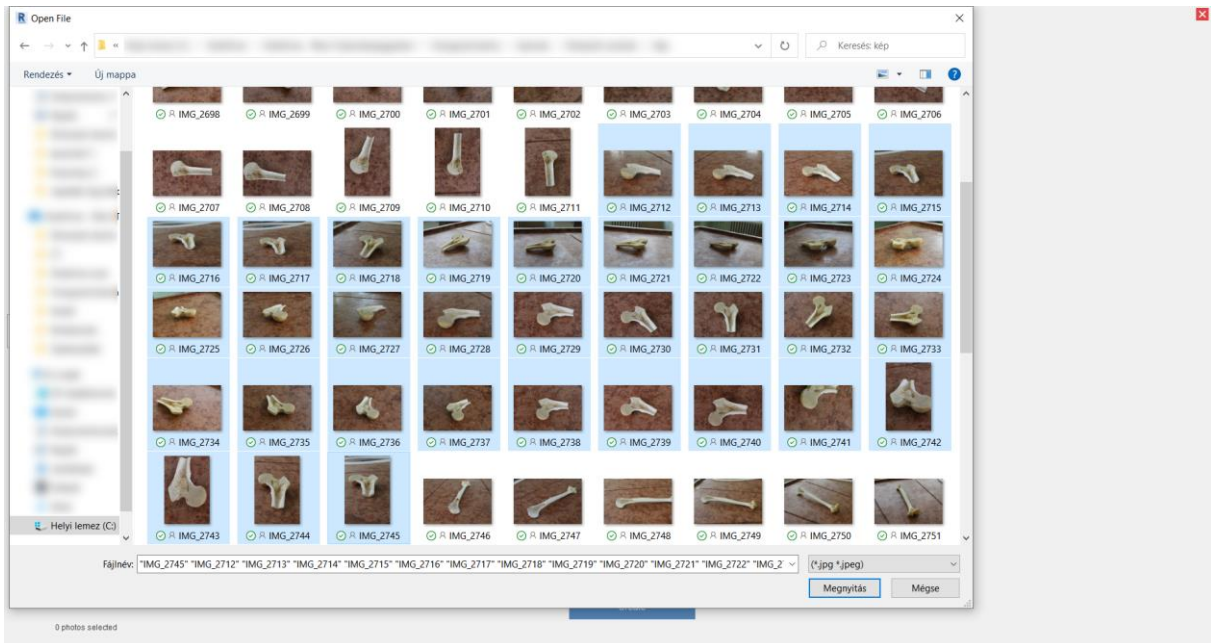

Review the images than click “Create”.

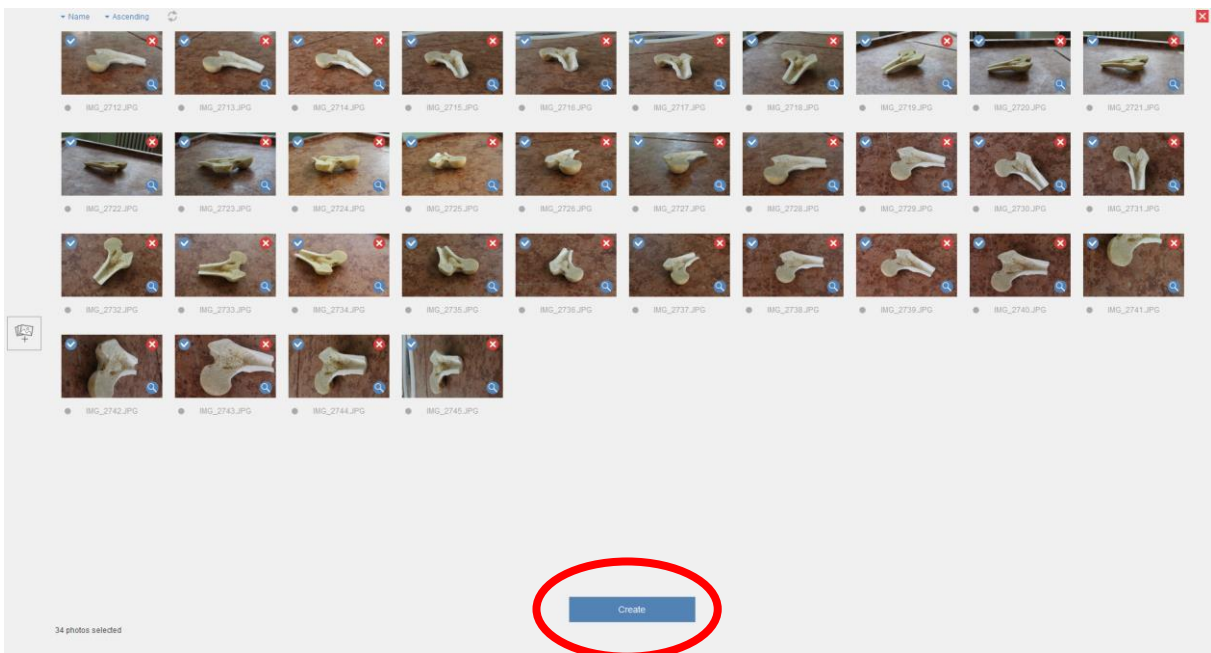

Choose a name for the project, then click “Start”.

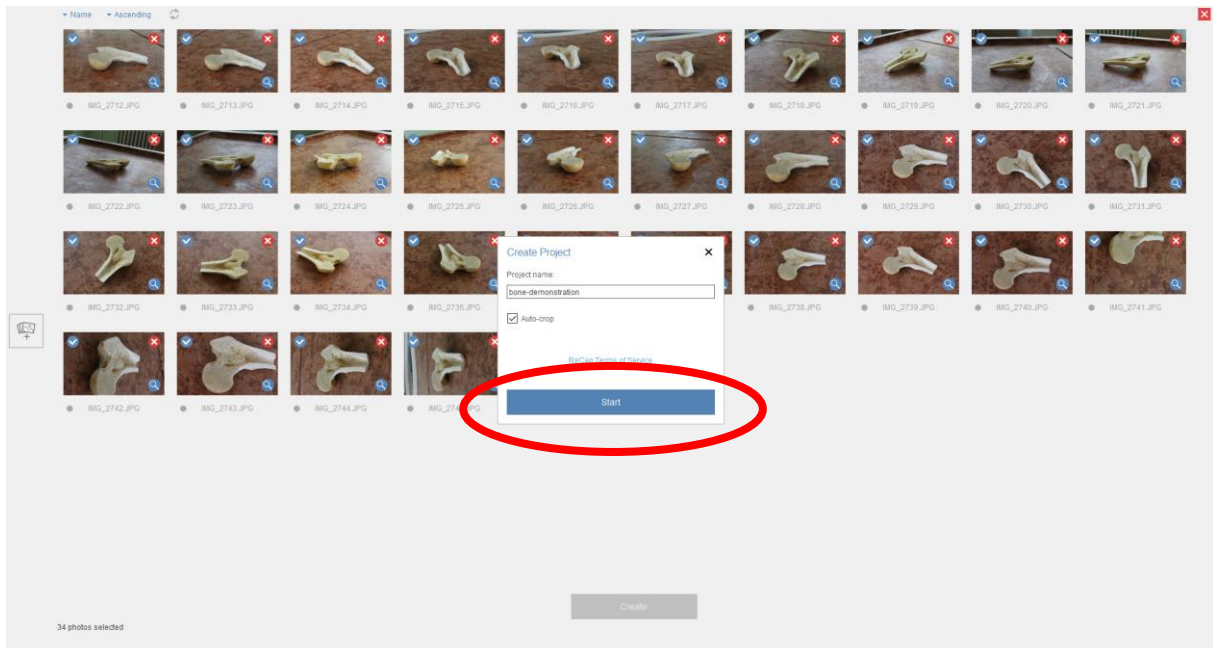

Images are uploading to Autodesk servers.

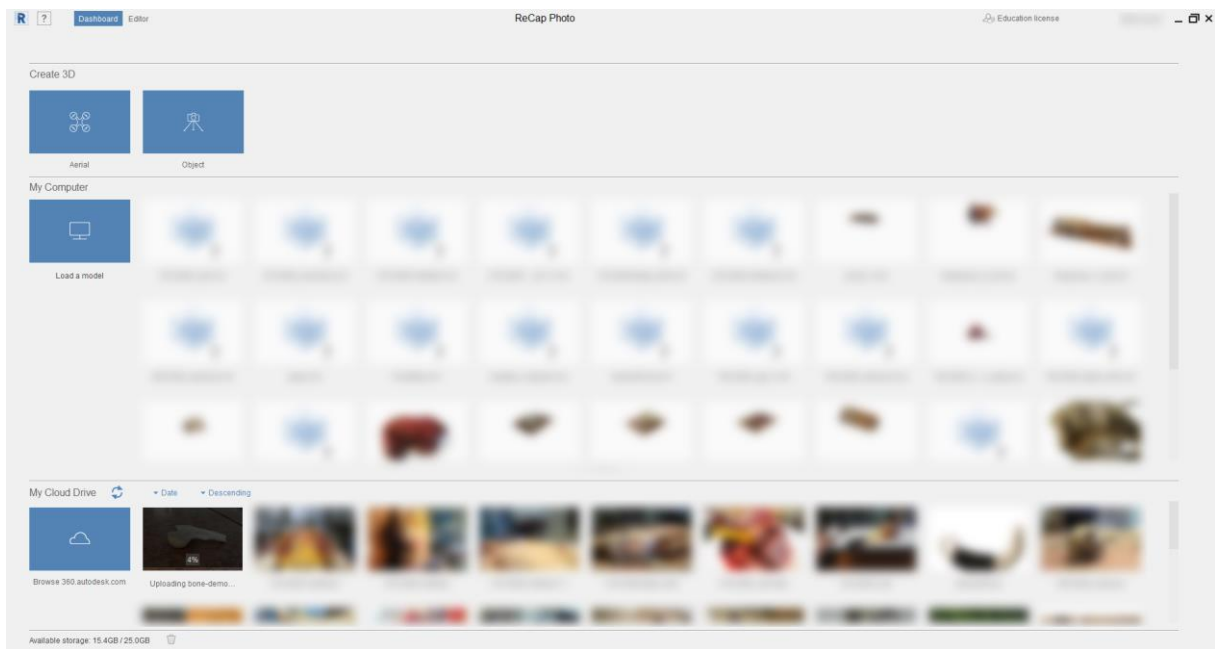

Project is waiting to be processed. (Time depends on server workload. Range from minutes to days)

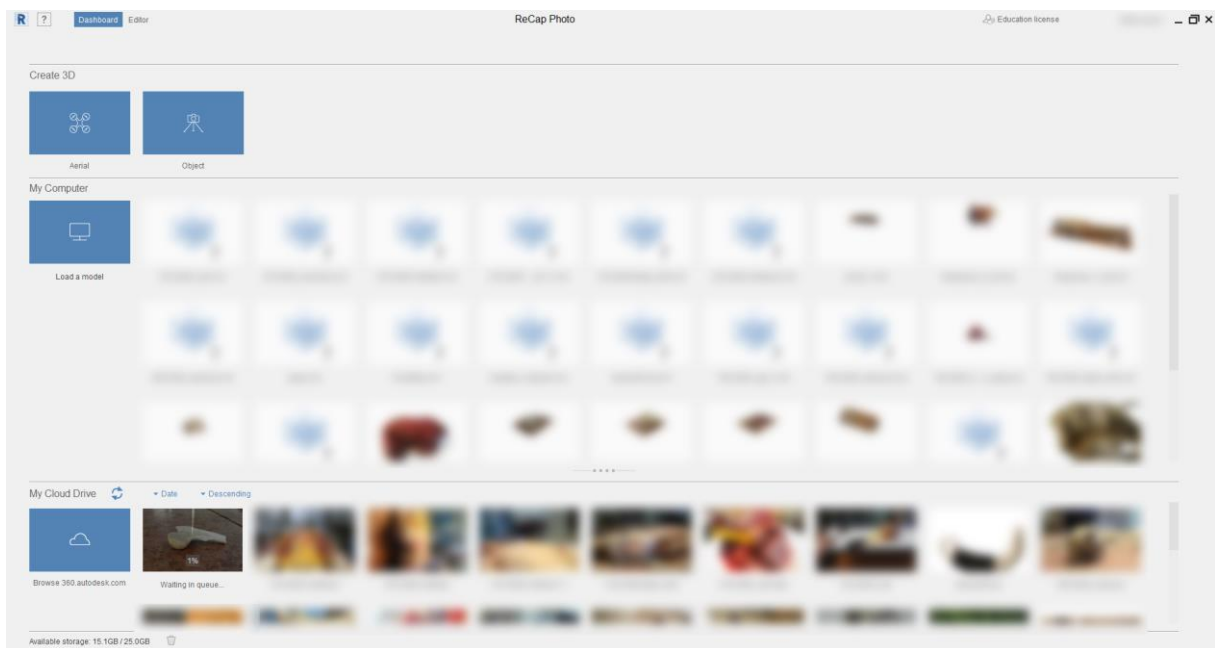

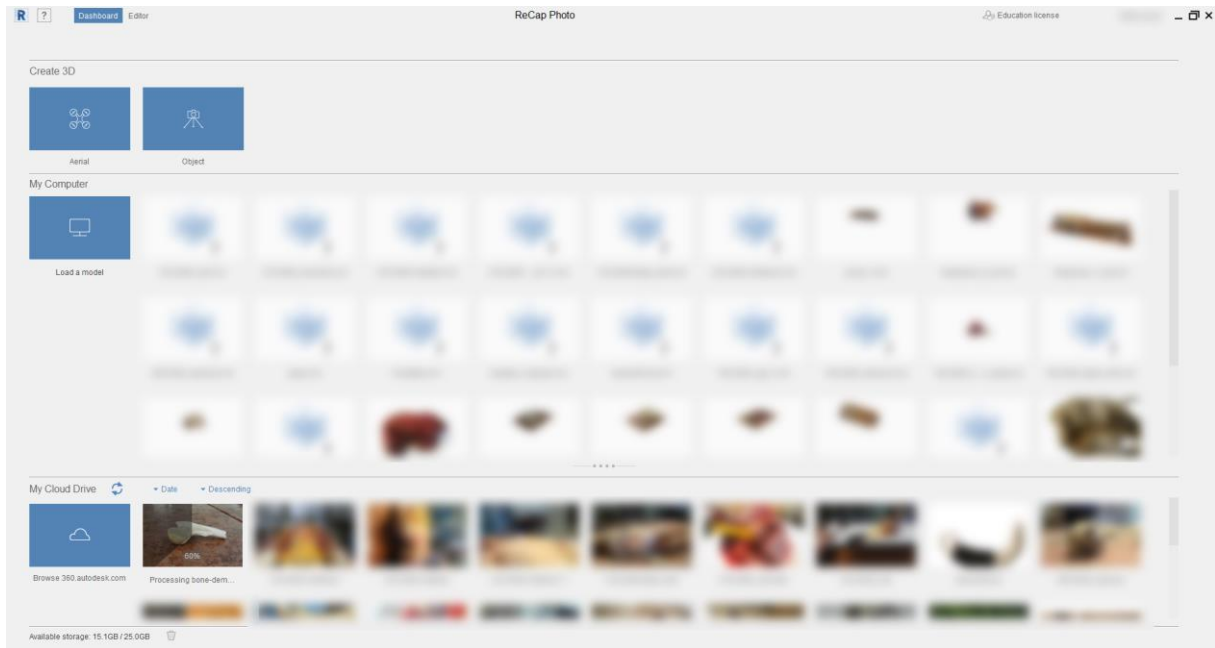

3D model is generated. To download, click on the blue arrow sign.

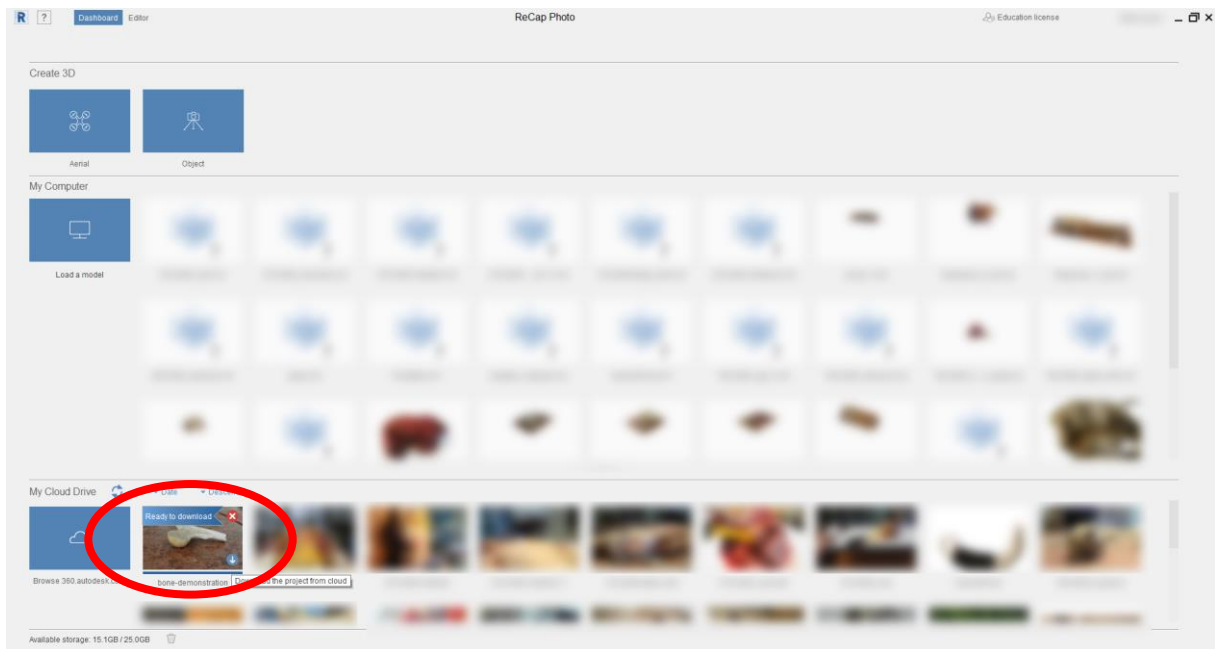

Downloaded projects appear at “My Computer” section.

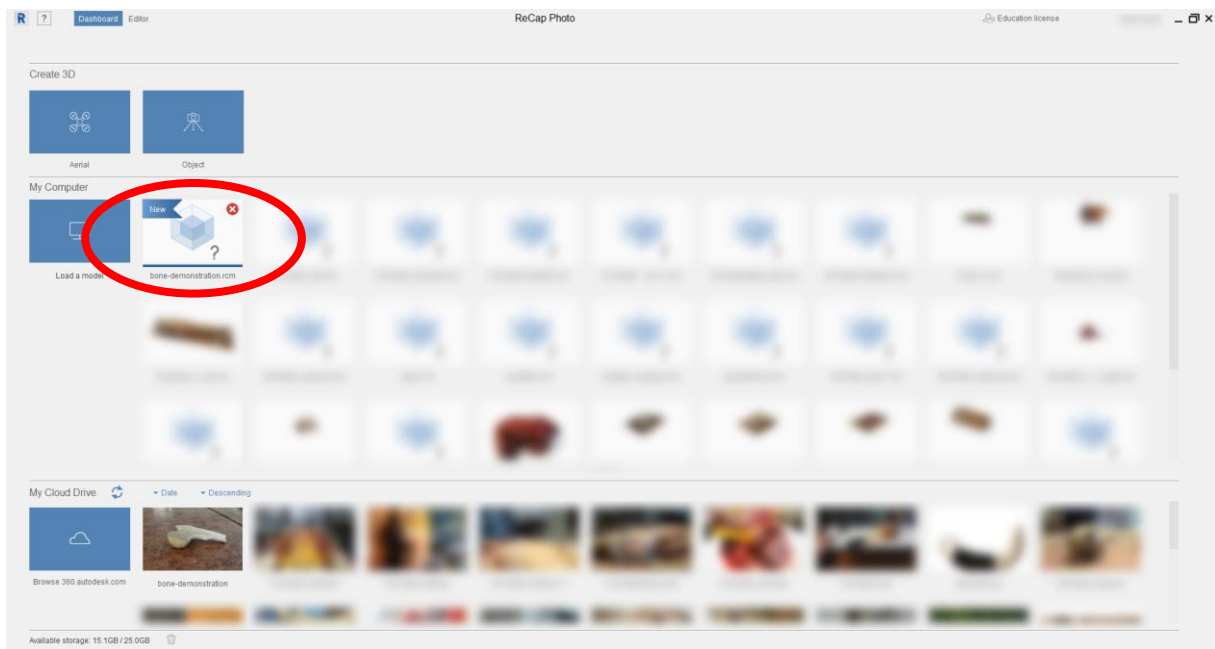

The model might need clean up by cropping the surrounding area.

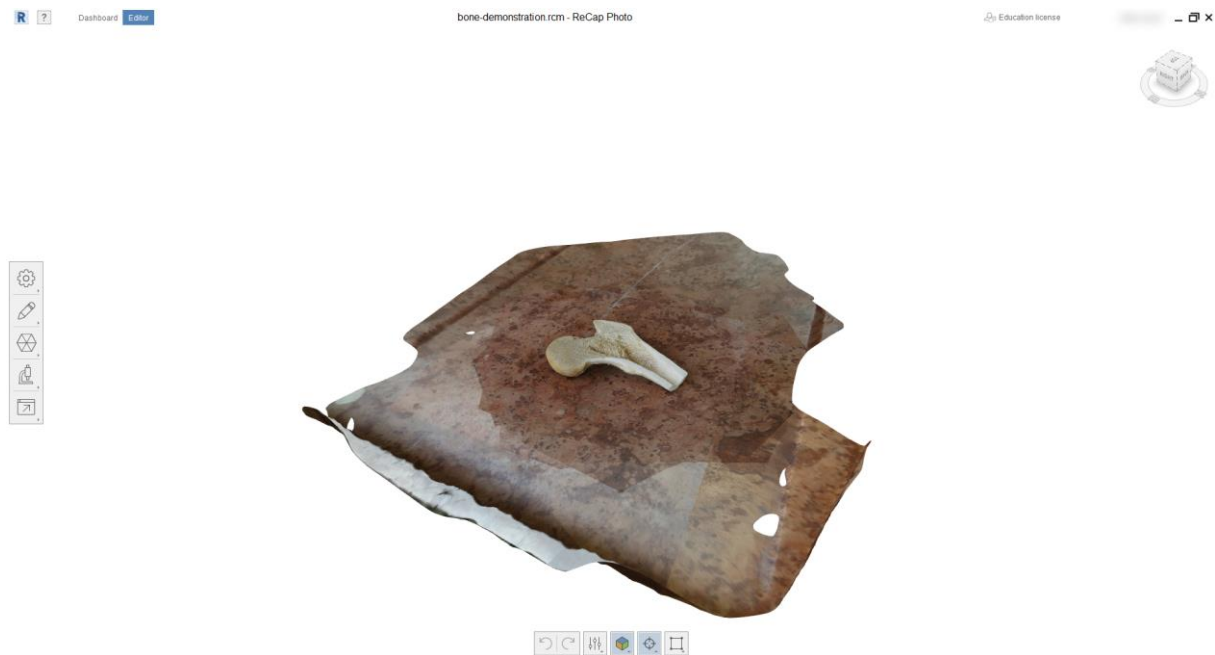



Choose the selection tool or hit Tab, then select the part of the object you want to keep.

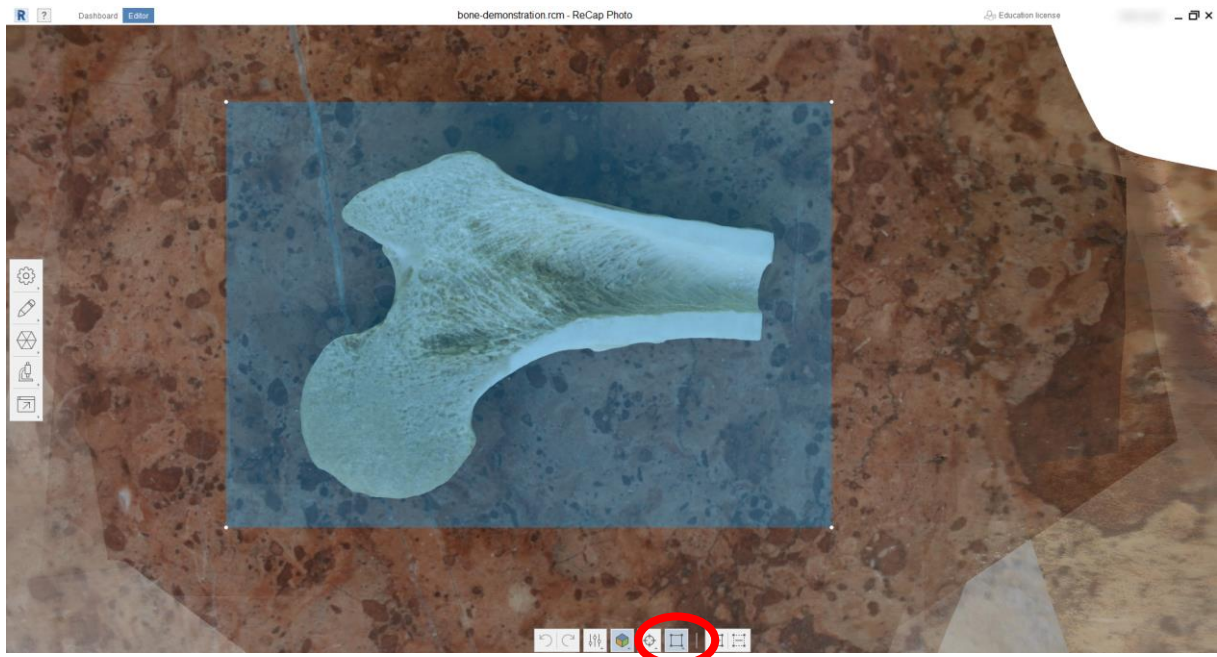

Choose "Invert selection", then hit Del to erase the unnecessary area.

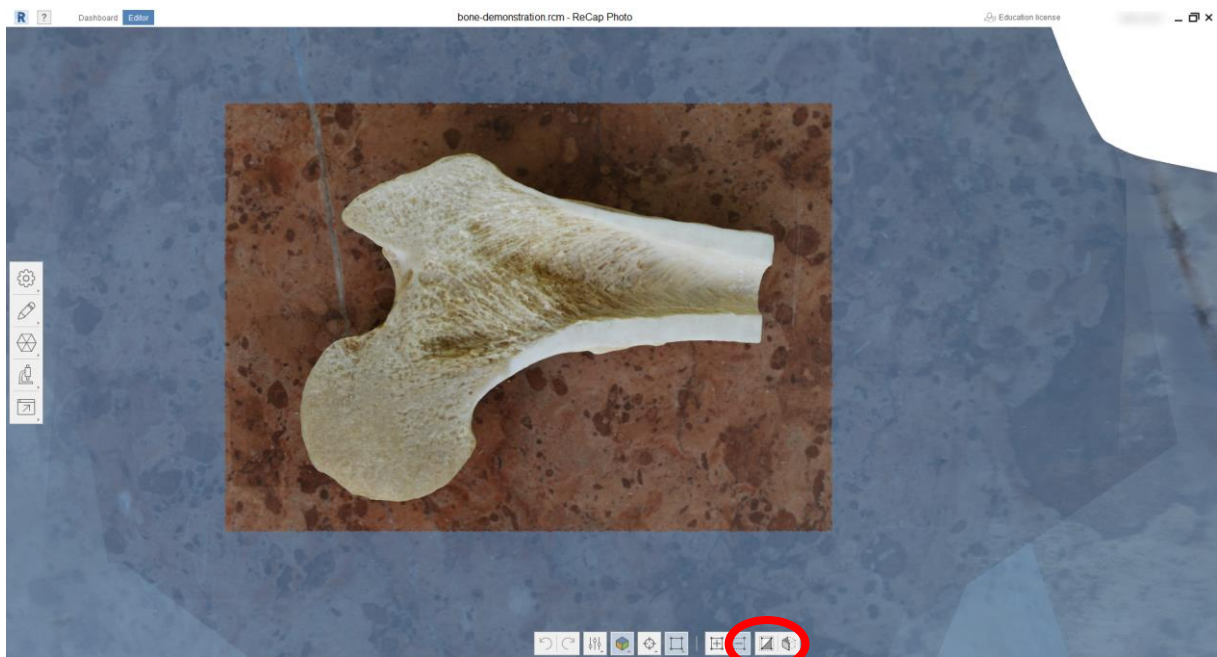



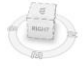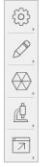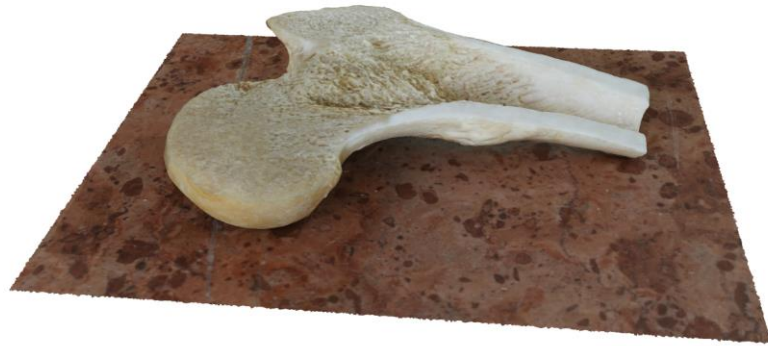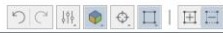

Supplement: JFO-66-1533-s002.pdf [file JFO-66-1533-s002.pdf]
